# Supplementary material for: Tuning the organic ligands to optimize the nitrogen reduction performance of Co(ii) or Ni(ii)-based MOFs
Source: Royal Society of Chemistry journal article supplement (doi:10.1039/d4qm00418c), 2024-01-01
Supplement: d4qm00418c1.pdf [file d4qm00418c1.pdf]

# Tuning organic ligands to optimize the nitrogen reduction performance of Co(II) or Ni(II)-based MOFs

Ling Qin<sup>\*,a,b</sup>, Ying-Xin Zhao<sup>a</sup>, Qiang Liu<sup>a</sup>, Jin-Long An<sup>a</sup>, Han-Xi Wang<sup>a</sup>, Mao-Feng Zhang<sup>a</sup>, Cheng-Wu Shi<sup>a</sup>, He-Gen Zheng<sup>\*,c</sup>

<sup>a</sup>*School of Chemistry and Chemical Engineering, Hefei University of Technology, Hefei, 230009, Anhui, P. R. China.*

<sup>b</sup>*School of Materials Science and Engineering, Hefei University of Technology, Hefei, 230009, Anhui, P. R. China.*

<sup>c</sup>*State Key Laboratory of Coordination Chemistry, School of Chemistry and Chemical Engineering, Collaborative Innovation Center of Advanced Microstructures, Nanjing University, Nanjing 210023, P. R. China.*

\*Corresponding author. E-mail: [qinling@hfut.edu.cn](mailto:qinling@hfut.edu.cn); [zhenghg@nju.edu.cn](mailto:zhenghg@nju.edu.cn)

## 1. Experiment

### 1.1 Materials

Sodium salicylate (C<sub>7</sub>H<sub>5</sub>O<sub>3</sub>N, 99.5%, Beijing Innochem Technology Co.); sodium hypochlorite (NaClO, >10% active chlorine, innochem); sodium nitroferricyanide dihydrate (C<sub>5</sub>FeN<sub>6</sub>Na<sub>2</sub>O·2H<sub>2</sub>O, 99%, innochem); ammonium chloride (NH<sub>4</sub>Cl, 99.5%, innochem), hydrazine monohydrochloride (ClH<sub>5</sub>N<sub>2</sub>, 98%, innochem); 4-(dimethylamino) benzaldehyde (C<sub>9</sub>H<sub>11</sub>NO, 99%, innochem); potassium sodium tartrate tetrahydrate (C<sub>4</sub>H<sub>4</sub>O<sub>6</sub>KNa·4H<sub>2</sub>O, 99.5%, innochem); N,N-dimethylformamide (C<sub>3</sub>H<sub>7</sub>NO, AR, 99.5%, innochem); ethanol (C<sub>2</sub>H<sub>6</sub>O, AR, innochem); N,N-

dimethylacetamide ( $C_4H_9NO$ , 99.9%, innochem); cobalt nitrate hexahydrate ( $Co(NO_3)_2 \cdot 6H_2O$ , 99%, Shanghai Aladdin Biochemical Technology Co.); nickel nitrate hexahydrate ( $Ni(NO_3)_2 \cdot 6H_2O$ , 98%, Sinopharm Group Chemical Reagent Co.); hydrochloric acid (HCl, 37%, Sinopharm Group Chemical Reagent Co.); sulfuric acid ( $H_2SO_4$ , 98%, Sinopharm Group Chemical Reagent Co.); hydrogen peroxide ( $H_2O_2$ , 30%, Sinopharm Group Chemical Reagent Co.); acetone ( $C_3H_6O$ , 99.5%, Sinopharm Group Chemical Reagent Co.); nitric acid ( $HNO_3$ , 68%, Sinopharm Group Chemical Reagent Co.); anhydrous sodium sulfate ( $Na_2SO_4$ , 99%, Beijing Innochem Technology Co.); nessler reagent ( $K_2HgI_4$ , AR, innochem); 2,5-bis(4-pyridyl)-1,3,4-thiadiazole ( $C_{12}H_8N_4S$ , 97%, Jinan Henghua Technology Co.); 1,4-di(pyridin-4-yl)benzene ( $C_{16}H_{12}N_2$ , 97%, Shanghai Adamas Reagent Co.); 3,5-bis(pyridine-4-yl)-4-amino-1,2,4-triazole ( $C_{12}N_6H_{10}$ , 97%, Jinan Henghua Technology Co.); 3,6-bis(4'-pyridyl)-1,2,4,5-tetrazine ( $C_{12}N_6H_8$ , 97%, Henghua); 4,4'-dithiodipyridine ( $C_{10}H_8N_2S_2$ , 98%, Extension); Nafion solution (5 wt%, Shanghai Macklin Biochemical Technology Co.); carbon cloth (WOS1011, Suzhou zhengtai Rongxin Material Co.). All reagents are of analytical reagent grade and do not require further purification.

## 1.2 Characterization instrument

X-ray diffraction (XRD) is measured on a fixed target X-ray diffractometer (PANalytical X-Pert PRO MPD) using Cu-K $\alpha$  radiation (1.5418 Å). The microscopic morphology of the sample is tested by thermal field emission scanning electron microscope (SEM, Gemini 500). X-ray photoelectron spectrum (XPS) measurement was performed on ESCALAB250Xi spectrometer (Thermo) using Al K $\alpha$  radiation.

BET measurement was performed on ASAP 2460 series multi-station extended automatic specific surface area and porosity analyzer.

### **1.3 Preparation**

#### **1.3.1 Preparation of Ni-dpt-H<sub>2</sub>tdc:**

The preparation of Ni-dpt-H<sub>2</sub>tdc is similar to that of Co-dpt-H<sub>2</sub>tdc, except that Co(NO<sub>3</sub>)<sub>2</sub>·6H<sub>2</sub>O is replaced by Ni(NO<sub>3</sub>)<sub>2</sub>·6H<sub>2</sub>O.

#### **1.3.2 Preparation of Ni-bptz-H<sub>2</sub>tdc:**

The preparation of Ni-bptz-H<sub>2</sub>tdc is similar to that of Co-bptz-H<sub>2</sub>tdc, except that Co(NO<sub>3</sub>)<sub>2</sub>·6H<sub>2</sub>O is replaced by Ni(NO<sub>3</sub>)<sub>2</sub>·6H<sub>2</sub>O.

#### **1.3.3 Preparation of Ni-bpat-H<sub>2</sub>tdc**

The preparation of Ni-bpat-H<sub>2</sub>tdc is similar to that of Co-bpat-H<sub>2</sub>tdc, except that Co(NO<sub>3</sub>)<sub>2</sub>·6H<sub>2</sub>O is replaced by Ni(NO<sub>3</sub>)<sub>2</sub>·6H<sub>2</sub>O.

#### **1.3.4 Preparation of Ni-dpb-H<sub>2</sub>tdc**

The preparation of Ni-dpb-H<sub>2</sub>tdc is similar to that of Co-dpb-H<sub>2</sub>tdc, except that Co(NO<sub>3</sub>)<sub>2</sub>·6H<sub>2</sub>O is replaced by Ni(NO<sub>3</sub>)<sub>2</sub>·6H<sub>2</sub>O.

#### **1.3.5 Preparation of Ni-pds-H<sub>2</sub>tdc**

The preparation of Ni-pds-H<sub>2</sub>tdc is similar to that of Co-pds-H<sub>2</sub>tdc, except that Co(NO<sub>3</sub>)<sub>2</sub>·6H<sub>2</sub>O is replaced by Ni(NO<sub>3</sub>)<sub>2</sub>·6H<sub>2</sub>O.

### **1.4 Electrochemical tests:**

We used a H-type electrolytic cell, separated by a Nafion 115 membrane, activated in an aqueous solution of H<sub>2</sub>O<sub>2</sub> (5 %), 0.5 M H<sub>2</sub>SO<sub>4</sub> and deionized water, respectively, for 1h at 85°C. A three-electrode system with a carbon cloth as the working electrode,

an Ag/AgCl (filled with saturated KCl solution) as the reference electrode, and a graphite rod as the counter electrode was used for the electrochemical experiments. An electrochemical workstation was used to perform electrochemical experiments in N<sub>2</sub> saturated 0.1 M Na<sub>2</sub>SO<sub>4</sub> solution. The potentials reported in this work were converted to reversible hydrogen electrode (RHE) scale by calibration with the equation  $E \text{ (RHE)} = E \text{ (vs. Ag/AgCl)} + 0.197 + 0.059 * \text{pH}$ .

Carbon cloth was sonicated with acetone, ethyl alcohol, and deionized water for 20 min each respectively and then soaked in 30 % HNO<sub>3</sub> for 24h, washed with H<sub>2</sub>O and dried at 60° for 12h.

Table S1 The synthesis conditions and crystal information of ten Co-MOFs and Ni-MOFs.

| MOFs                       | Solvent ratio               | Shape      | Colour       | Yield |
|----------------------------|-----------------------------|------------|--------------|-------|
| Co-dpt-H <sub>2</sub> tdc  | DMF: H <sub>2</sub> O=3:1   | prismatic  | red          | 69%   |
| Co-bptz-H <sub>2</sub> tdc | DMF: H <sub>2</sub> O=1:1   | prismatic  | red          | 51%   |
| Co-bpat-H <sub>2</sub> tdc | DMA: H <sub>2</sub> O=1:1   | prismatic  | purplish-red | 66%   |
| Co-dpb-H <sub>2</sub> tdc  | DMF: H <sub>2</sub> O=1.5:1 | needlelike | pink         | 46%   |
| Co-pds-H <sub>2</sub> tdc  | DMF: H <sub>2</sub> O=2:1   | block      | pink         | 63%   |
| Ni-dpt-H <sub>2</sub> tdc  | DMF: H <sub>2</sub> O=3:1   | prismatic  | green        | 65%   |
| Ni-bptz-H <sub>2</sub> tdc | DMF: H <sub>2</sub> O=1:1   | prismatic  | green        | 56%   |
| Ni-bpat-H <sub>2</sub> tdc | DMA: H <sub>2</sub> O=1:1   | prismatic  | green        | 62%   |
| Ni-dpb-H <sub>2</sub> tdc  | DMF: H <sub>2</sub> O=1.5:1 | needlelike | green        | 49%   |
| Ni-pds-H <sub>2</sub> tdc  | DMF: H <sub>2</sub> O=2:1   | block      | blue         | 60%   |

#### **1.4.1 Preparation of working electrode:**

1 mL of ethyl alcohol and 20  $\mu\text{L}$  of Nafion solution (5 wt%) were added to 5 mg of catalyst, the mixture was sonicated for 30 min. Then 20  $\mu\text{L}$  of the dispersed solution of catalyst was dripped onto the carbon cloth.

#### **1.4.2 Detection of $\text{NH}_3$ :**

##### **1.4.2.1 Indophenol blue spectrophotometry:**

The concentration of  $\text{NH}_3$  generated was determined by indophenol blue spectrophotometry. 2 mL of electrolyte was taken from the cathode chamber and 1 mL of oxidizing solution containing  $\text{NaClO}$  (>10% active chlorine), 2 mL of color developing solution containing sodium salicylate and potassium sodium tartrate tetrahydrate and 0.2 mL of catalyst solution containing sodium nitroferricyanide dihydrate were added, and the reaction was carried out for 1 h. In 0.1 M  $\text{Na}_2\text{SO}_4$  solution to calibrate the concentration absorption curves with  $\text{NH}_4\text{Cl}$  standard solutions with  $\text{NH}_3$  concentrations of 0, 0.1, 0.2, 0.4, 0.8, 1, 1.2, 1.5 and 2  $\mu\text{g}\cdot\text{mL}^{-1}$ . These solutions were characterized by UV-Vis spectroscopy at 655 nm. The concentration-absorption curves were calibrated with a range of concentrations of  $\text{NH}_3$  standard solutions. The fitted curve ( $y = 0.50339x + 0.0254$ ,  $R^2 = 0.999$ ) showed a good linear relationship between the absorbance values and  $\text{NH}_3$  concentration.

##### **1.4.2.2 Nessler's reagent spectrophotometry:**

The concentration of  $\text{NH}_3$  generated was also determined by Nessler's reagent spectrophotometry. 25 mL of electrolyte was taken from the cathode chamber, 0.5 mL of potassium tartrate sodium solution was added, stirred well and 0.5 mL of Nessler's

reagent was added dropwise, shaken well, and left to stand for 20 min. The absorbance value-concentration curves were calibrated with  $\text{NH}_4\text{Cl}$  standard solutions in 0.1 M  $\text{Na}_2\text{SO}_4$  solution with  $\text{NH}_3$  concentrations of 0, 0.1, 0.2, 0.4, 0.8, 1.2, 1.6, and 2  $\mu\text{g}\cdot\text{mL}^{-1}$ . These solutions were characterized by UV-visible spectroscopy at 420 nm. The absorbance value-concentration curves were calibrated with a range of concentrations of  $\text{NH}_3$  standard solutions. The fitted curve ( $y = 0.19148x + 0.01146$ ,  $R^2 = 0.999$ ) showed a good linear relationship between absorbance values and  $\text{NH}_3$  concentration.

#### **1.4.3 Detection of $\text{N}_2\text{H}_4$ :**

The Watt-Chrisp method was used to estimate  $\text{N}_2\text{H}_4$  production. The color developer was a mixed solution of 5.99 g 4-(dimethylamino) benzaldehyde, 30 mL HCl and 300 mL  $\text{C}_2\text{H}_5\text{OH}$ . 5 mL of electrolyte was removed from the electrochemical reaction vessel, 5 mL of prepared color developer was added, and the absorbance of the solution at 455 nm was measured at room temperature for 15 min to quantify the yield of hydrazine by the standard curve of hydrazine ( $y = 1.41171x + 0.0119$ ,  $R^2 = 0.998$ ).

#### **1.4.4 Determination of FE and $\text{NH}_3$ :**

FE is calculated by the formula:

$$\text{FE} = 3 \times F \times [\text{NH}_3] \times V / 17 \times Q \times 100\%$$

$\text{NH}_3$  yield is calculated by the formula:

$$\text{NH}_3 \text{ yield} = [\text{NH}_3] \times V / t \times m$$

F is Faraday constant ( $96500 \text{ C}\cdot\text{mol}^{-1}$ ),  $[\text{NH}_3]$  is the  $\text{NH}_3$  concentration of the electrolyte calculated according to the standard curve ( $\text{mg}\cdot\text{L}^{-1}$ ); Q is the total amount of electricity

applied,  $V$  is the volume of electrolyte (ml);  $t$  is the reaction time (h);  $m$  is the mass of catalyst (mg).

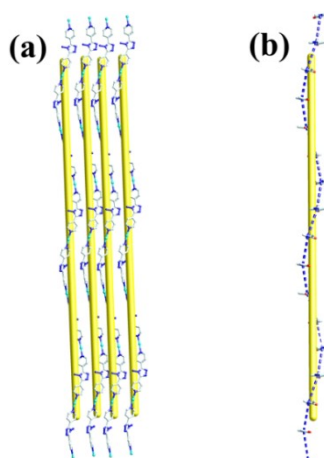

**Figure S1** (a) A view of 1D right-helical chain relying on the coordinate interaction between nitrogen and Co ions in Co-bpat-H<sub>2</sub>tdc; (b) A view of 1D right-helical DMA helical channel inside the molecular helix in Co-bpat-H<sub>2</sub>tdc.

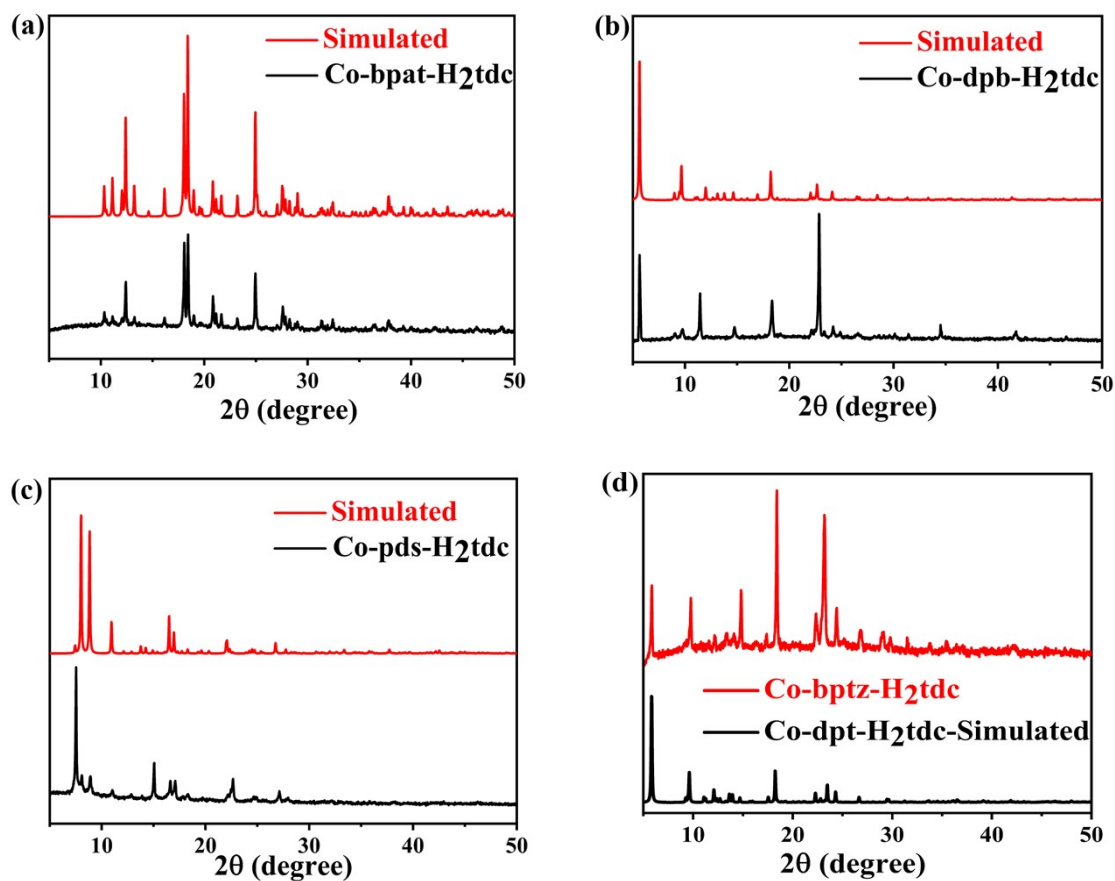

**Figure S2** PXRD of synthesized sample and standard spectra simulated by single crystal diffraction data of (a) Co-bpat-H<sub>2</sub>tdc, (b) Co-dpb-H<sub>2</sub>tdc, (c) Co-pds-H<sub>2</sub>tdc, (d) Co-bptz-H<sub>2</sub>tdc and standard spectra simulated by Co-dpt-H<sub>2</sub>tdc.

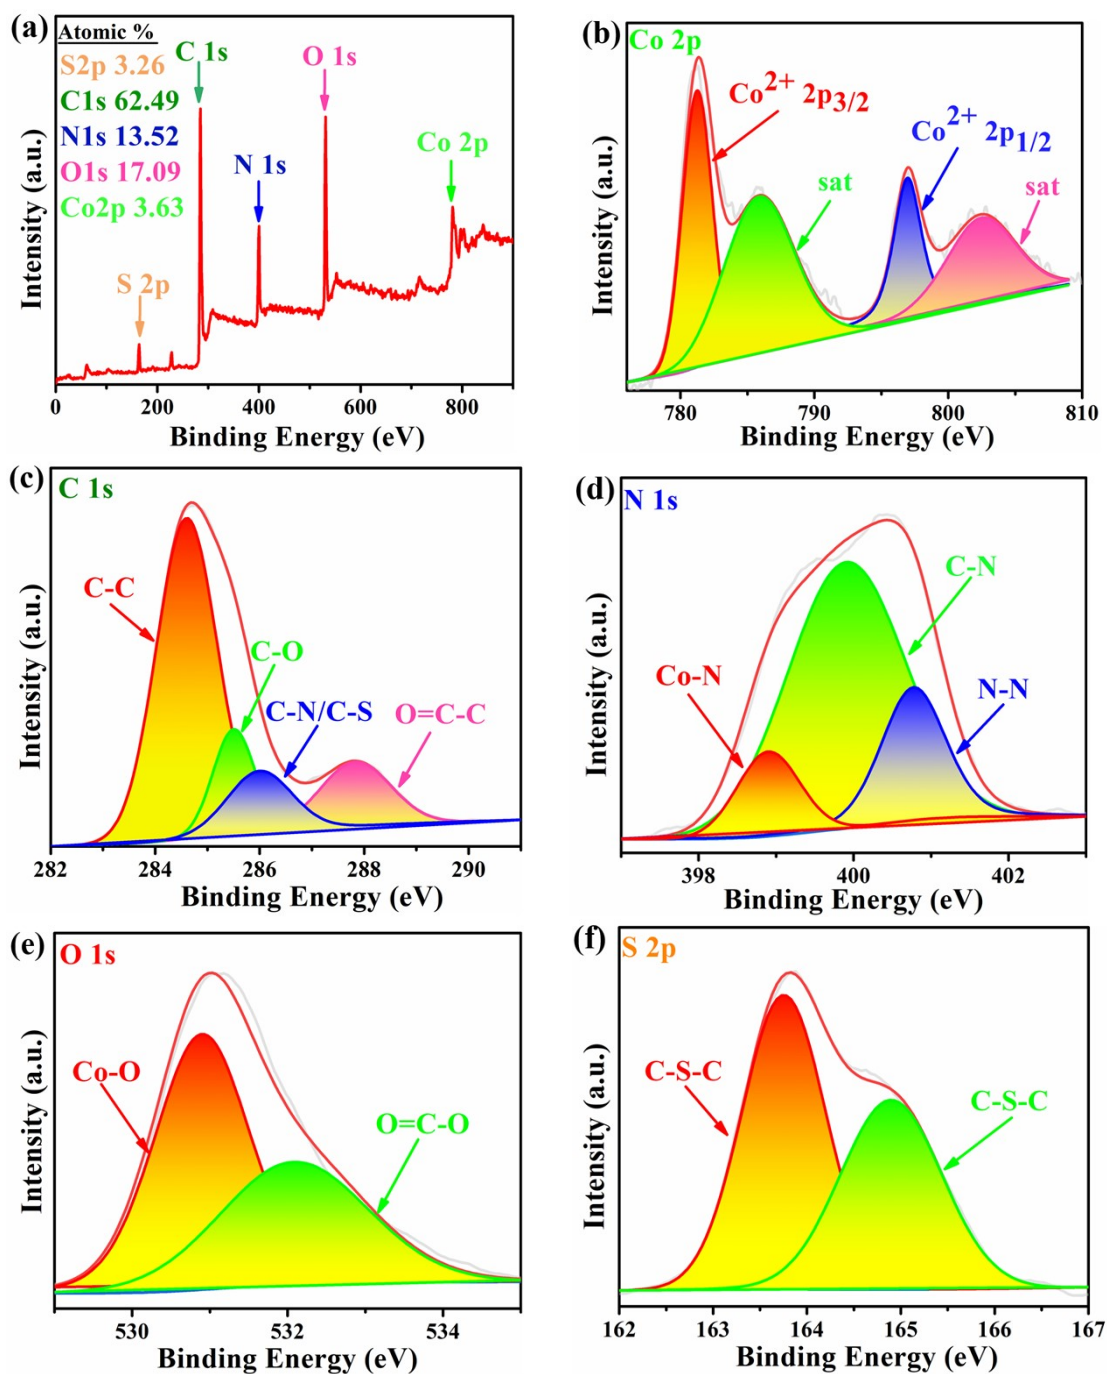

**Figure S3** (a) XPS survey of Co-bptz-H<sub>2</sub>tdc; (b) Co 2p; (c) C 1s; (d) N 1s; (e) O 1s; (f) S 2p spectrum.



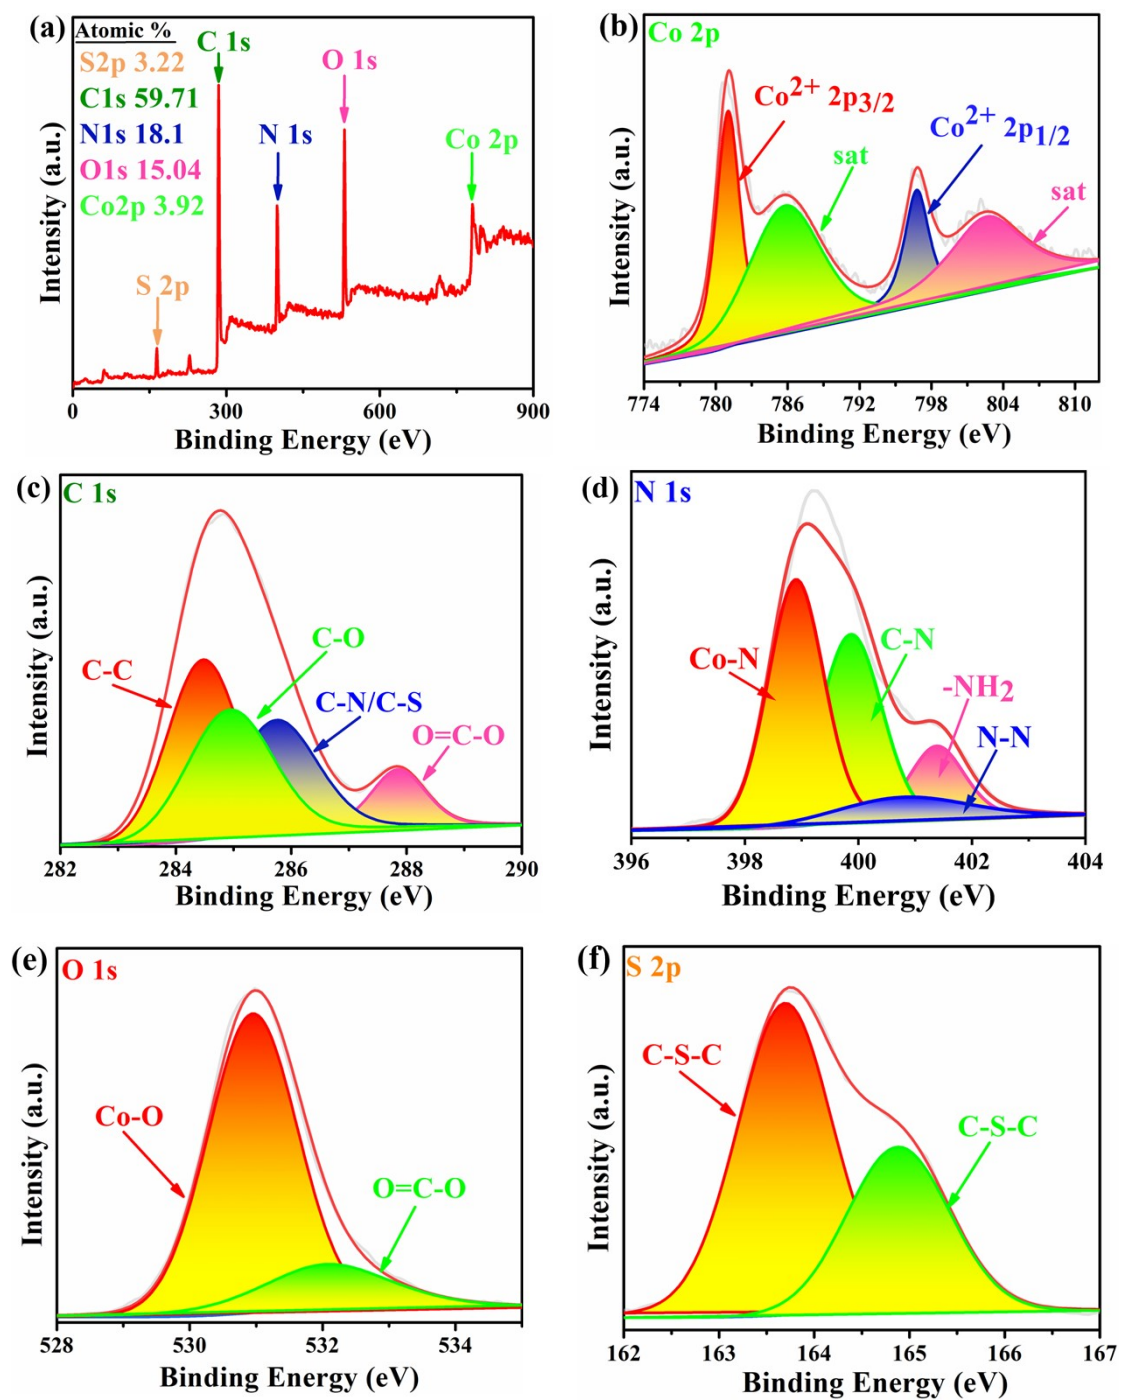

**Figure S4** (a) XPS survey of Co-bpat-H<sub>2</sub>tdc; (b) Co 2p; (c) C 1s; (d) N 1s; (e) O 1s; (f) S 2p spectrum.

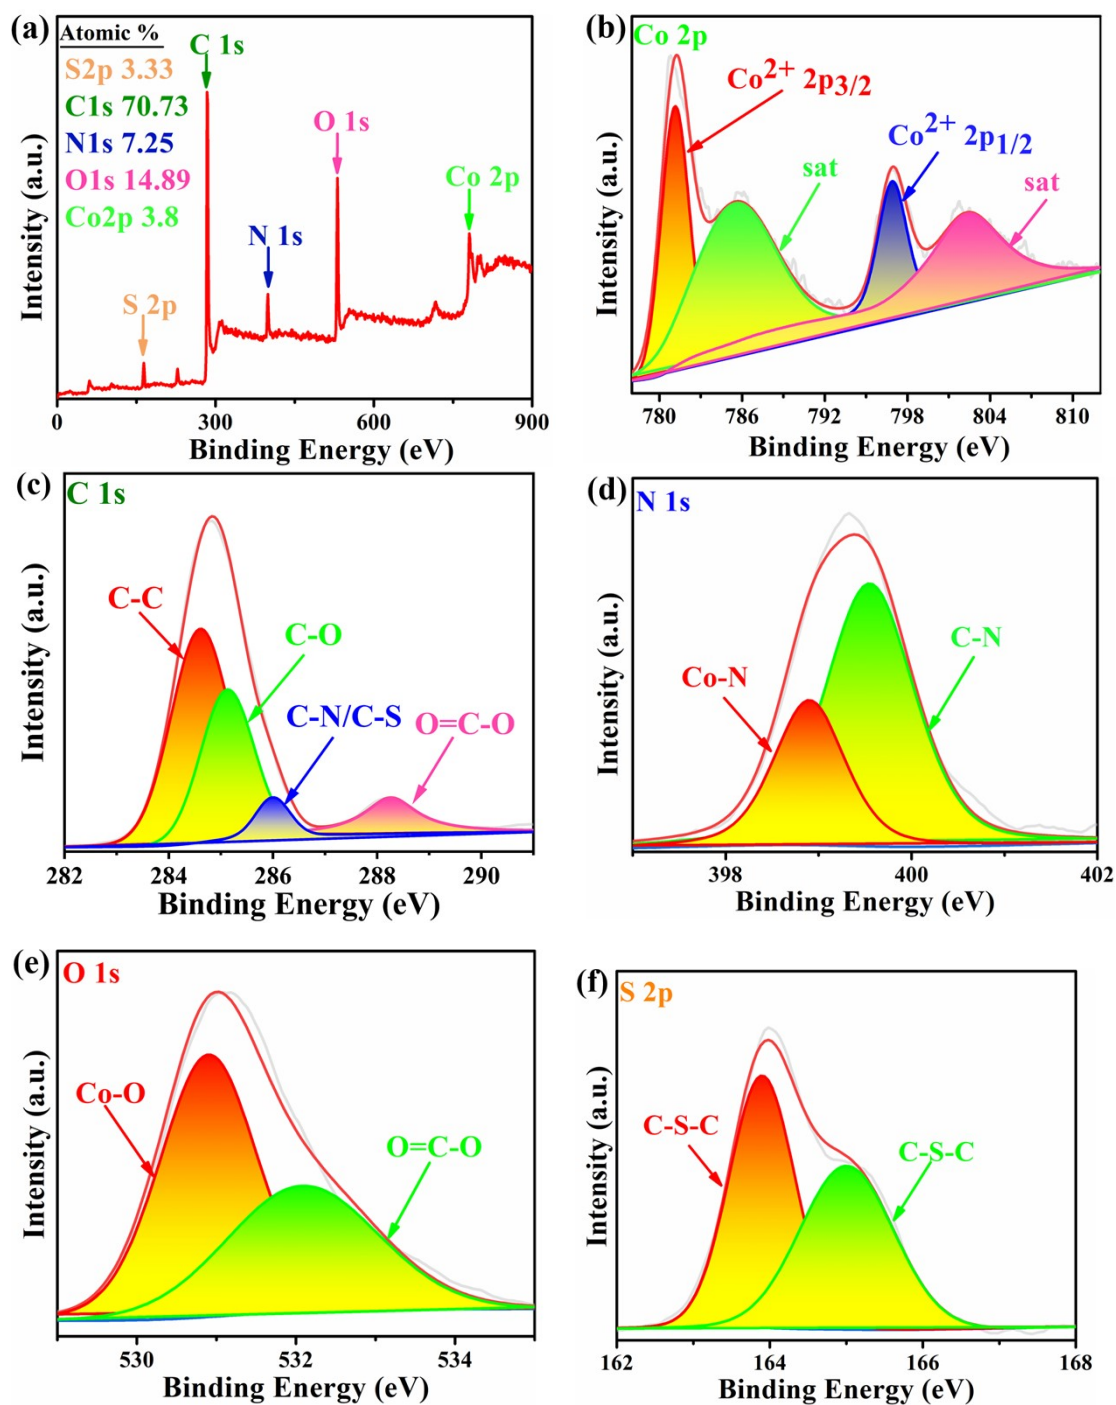

**Figure S5** (a) XPS survey of Co-dpb-H<sub>2</sub>tdc; (b) Co 2p; (c) C 1s; (d) N 1s; (e) O 1s; (f) S 2p spectrum.

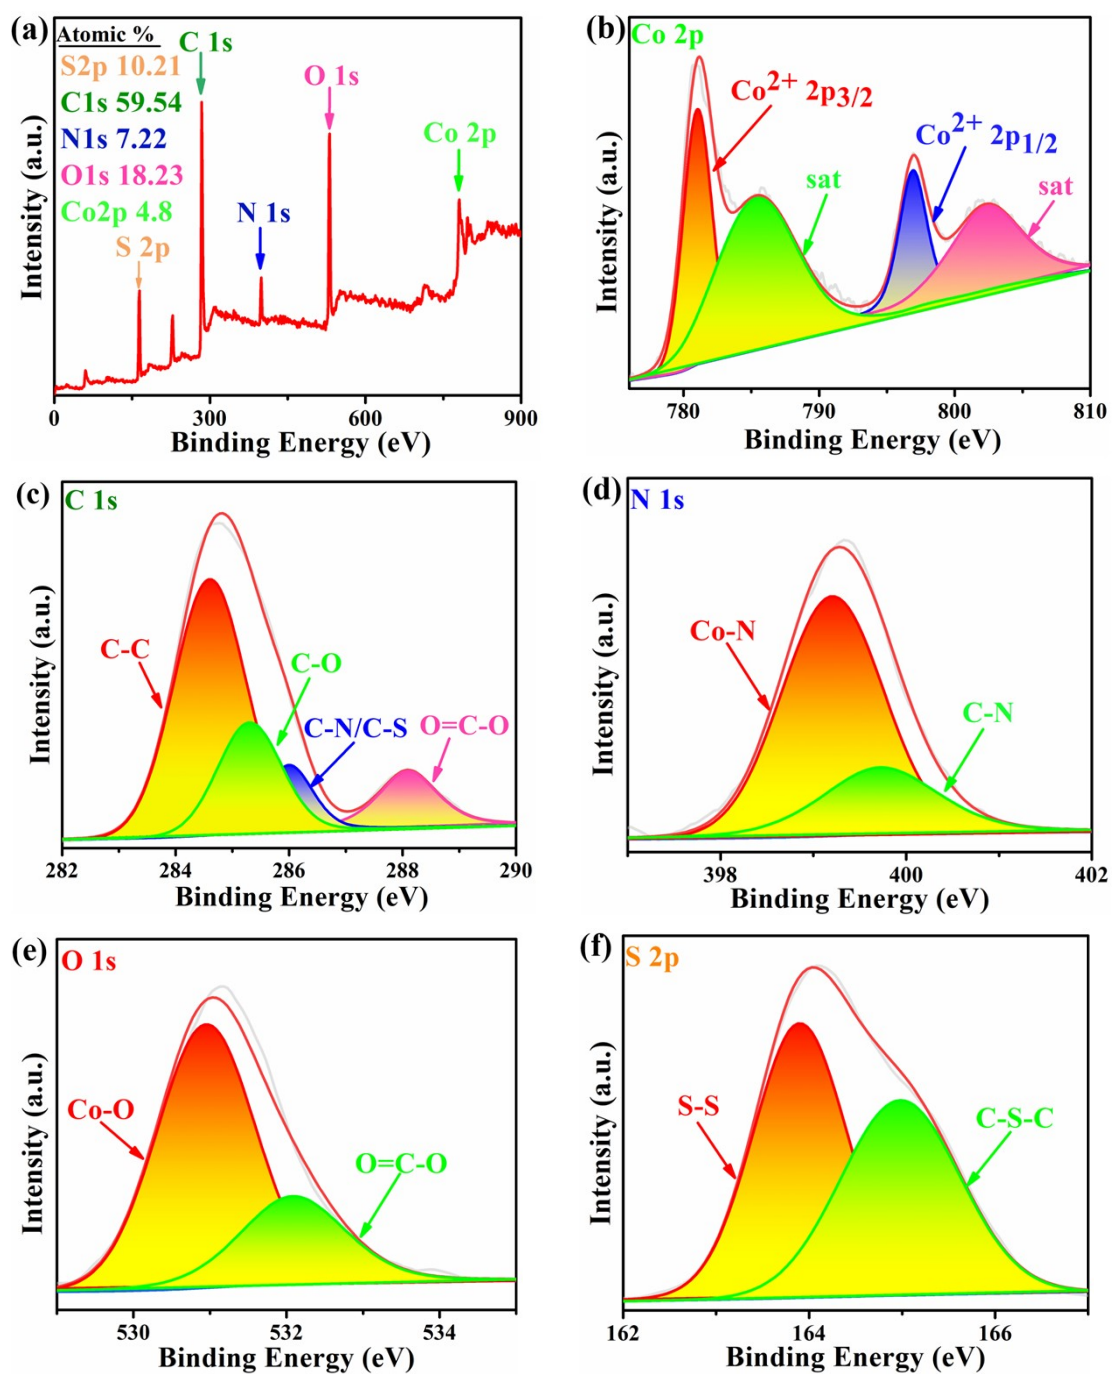

**Figure S6** (a) XPS survey of Co-pds-H<sub>2</sub>tdc; (b) Co 2p; (c) C 1s; (d) N 1s; (e) O 1s; (f) S 2p spectrum.

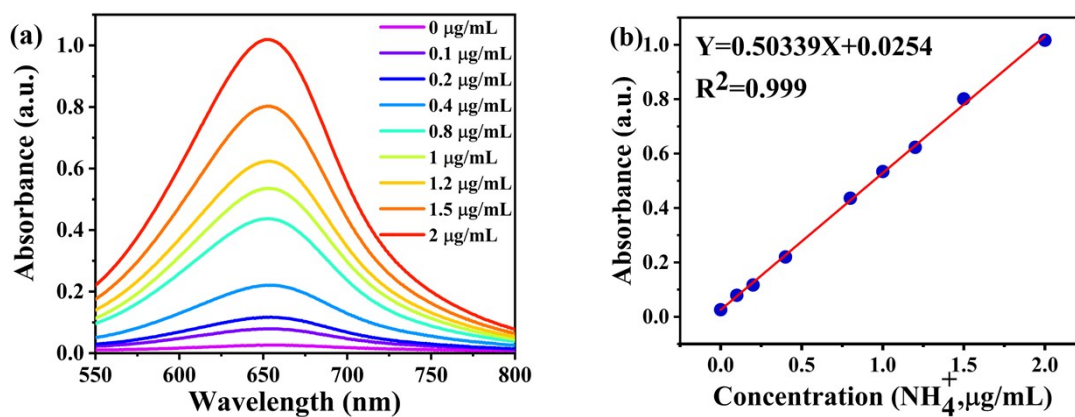

**Figure S7** (a) UV absorbance spectrum for quantitative measurement of  $\text{NH}_3$  nitrogen by indophenol blue after incubated for 1 h at room temperature; (b) the corresponding calibration curve used for calculation of  $\text{NH}_4^+$  concentrations.

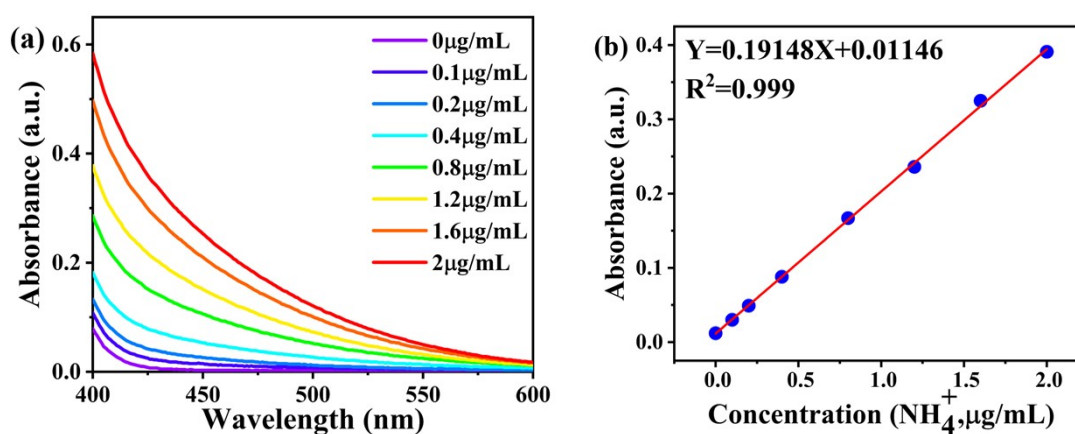

**Figure S8** (a) UV absorbance spectrum for quantitative measurement of  $\text{NH}_3$  nitrogen by Nessler's Reagent Spectrophotometry after incubated for 20 min at room temperature; (b) the corresponding calibration curve used for calculation of  $\text{NH}_4^+$  concentrations.

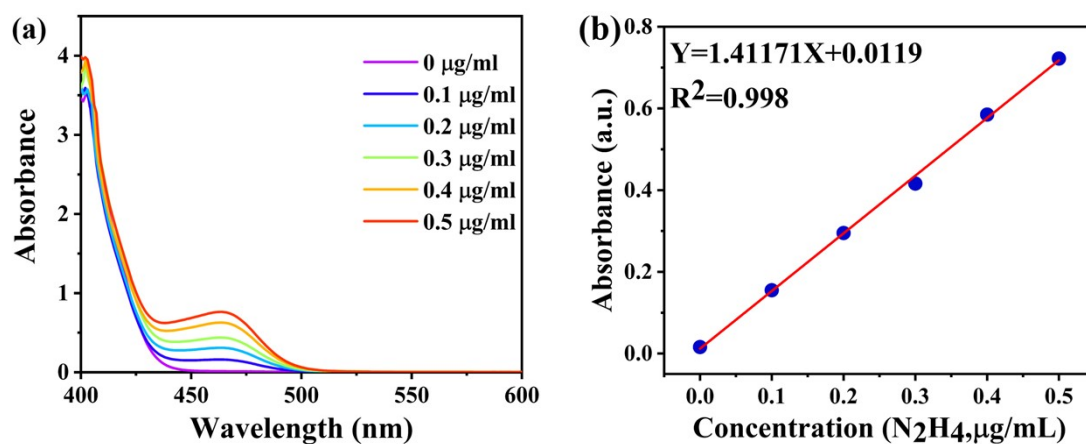

**Figure S9** (a) UV-vis absorption spectrum of  $N_2H_4$  quantitatively measured by Watt-chrisp method after incubated for 15 min at room temperature; (b) calibration curve of  $N_2H_4$  measured by Watt-chrisp method.

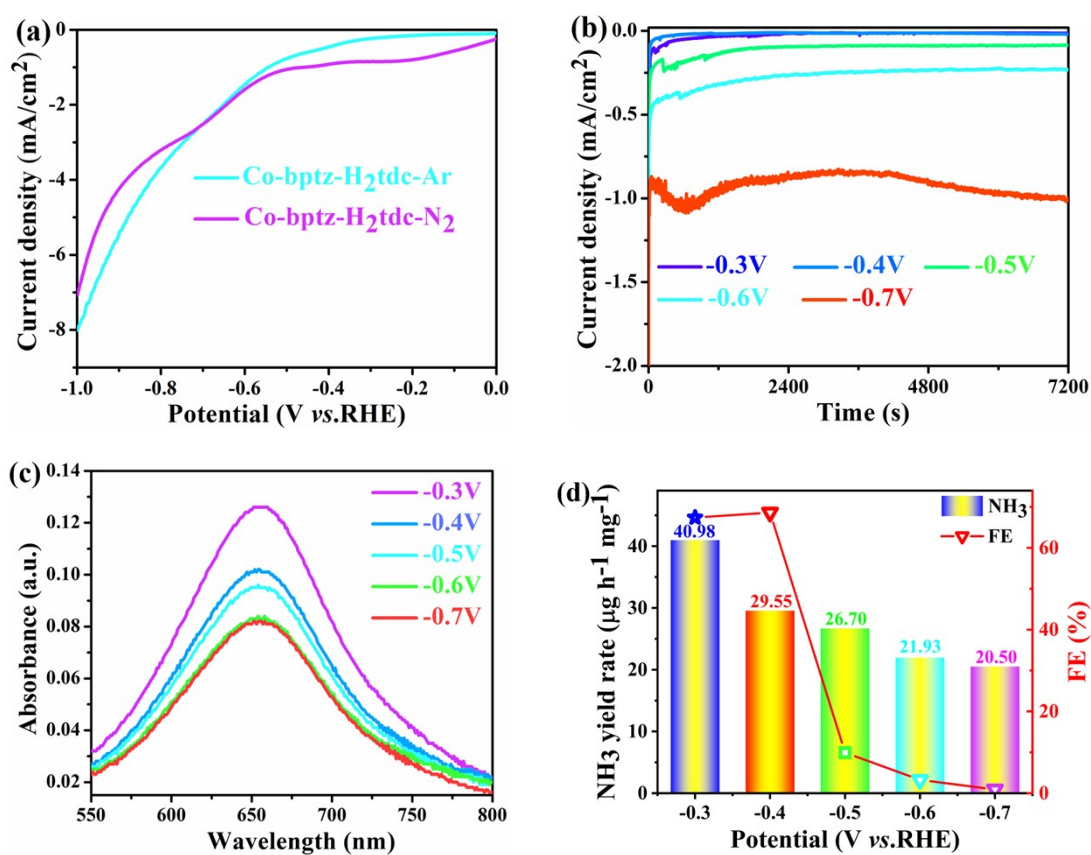

**Figure S10** (a) Polarization curves of Co-bptz- $H_2tdc$  in  $N_2$  and Ar-saturated 0.1M  $Na_2SO_4$  electrolyte; (b) Time-dependent current densities curves of Co-bptz- $H_2tdc$  at



different potentials from -0.3 V to -0.7 V; (c) UV-vis spectra were estimated with the indophenol blue method at five given voltages for Co-bpat-H<sub>2</sub>tdc; (d) NH<sub>3</sub> yield and FE of Co-bpat-H<sub>2</sub>tdc at different potentials from -0.3V to -0.7V.

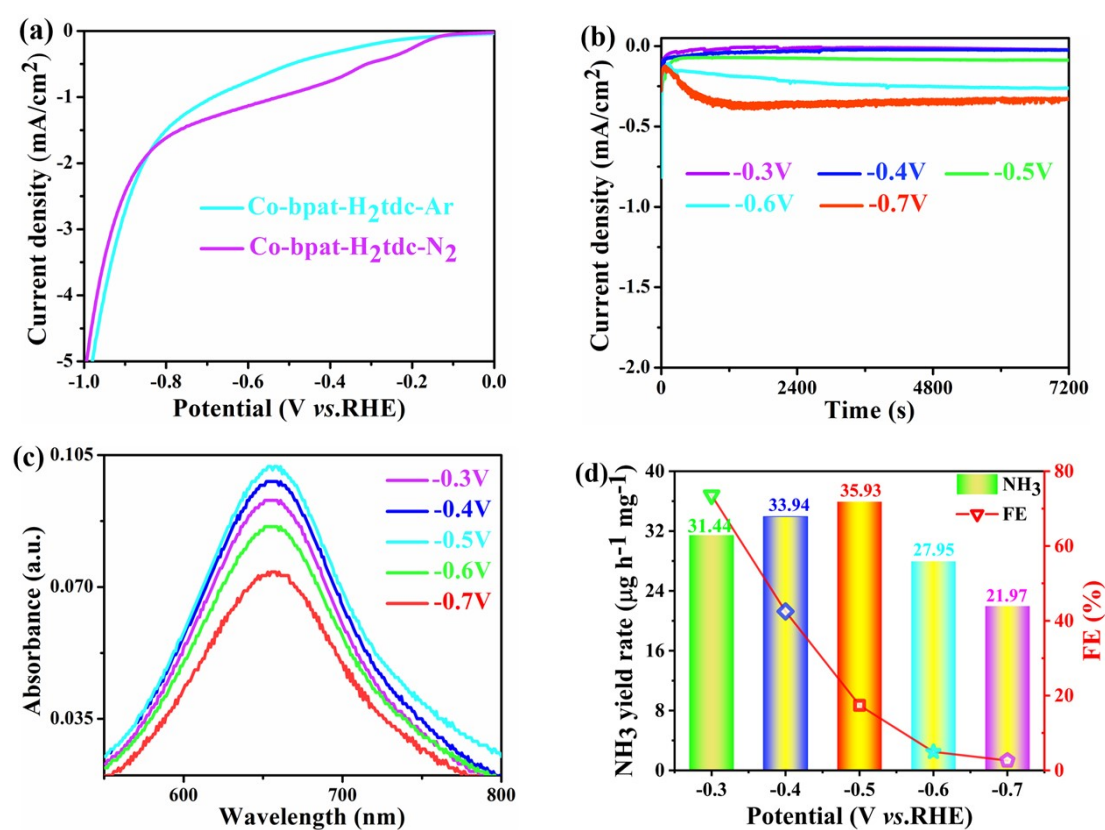

**Figure S11** (a) Polarization curves of Co-bpat-H<sub>2</sub>tdc in N<sub>2</sub> and Ar-saturated 0.1M Na<sub>2</sub>SO<sub>4</sub> electrolyte; (b) Time-dependent current densities curves of Co-bpat-H<sub>2</sub>tdc at different potentials from -0.3 V to -0.7 V; (c) UV-vis spectra were estimated with the indophenol blue method at five given voltages for Co-bpat-H<sub>2</sub>tdc; (d) NH<sub>3</sub> yield and FE of Co-bpat-H<sub>2</sub>tdc at different potentials from -0.3V to -0.7V.

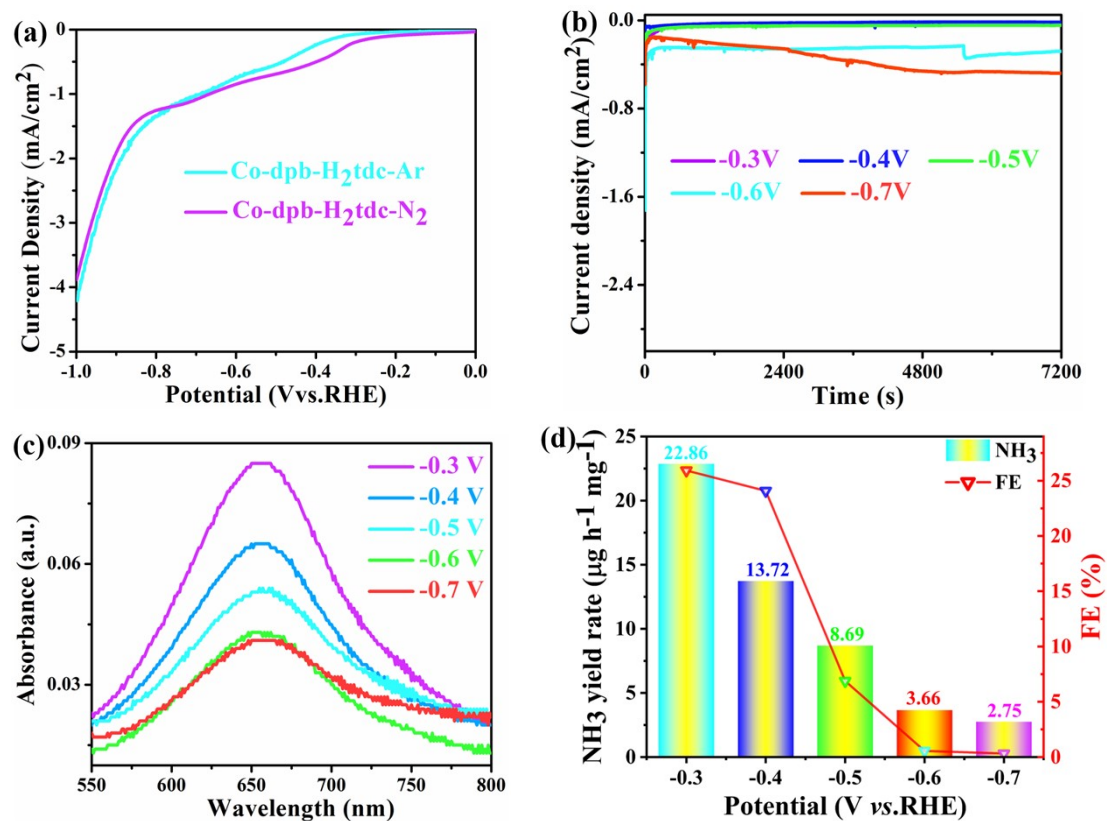

**Figure S12** (a) Polarization curves of Co-dpb-H<sub>2</sub>tdc in N<sub>2</sub> and Ar-saturated 0.1M Na<sub>2</sub>SO<sub>4</sub> electrolyte; (b) Time-dependent current densities curves of Co-dpb-H<sub>2</sub>tdc at different potentials from -0.3 V to -0.7 V; (c) UV-vis spectra were estimated with the indophenol blue method at five given voltages for Co-dpb-H<sub>2</sub>tdc; (d) NH<sub>3</sub> yield and FE of Co-dpb-H<sub>2</sub>tdc at different potentials from -0.3V to -0.7V.

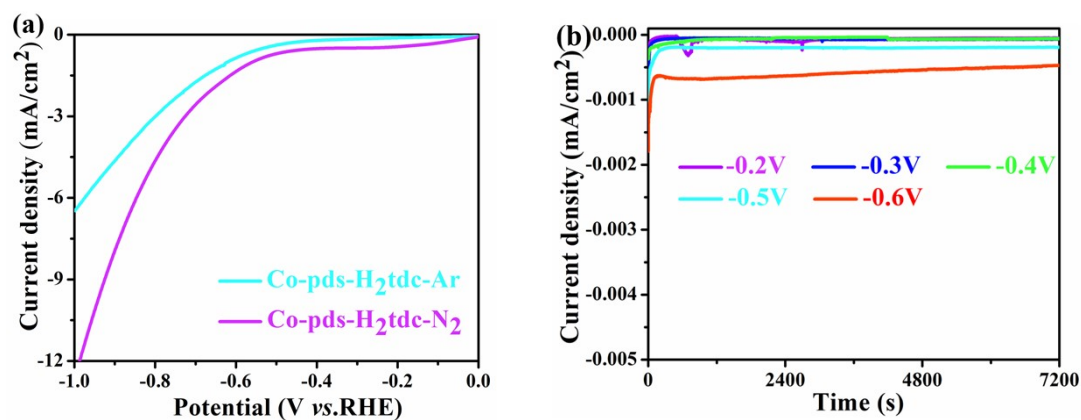

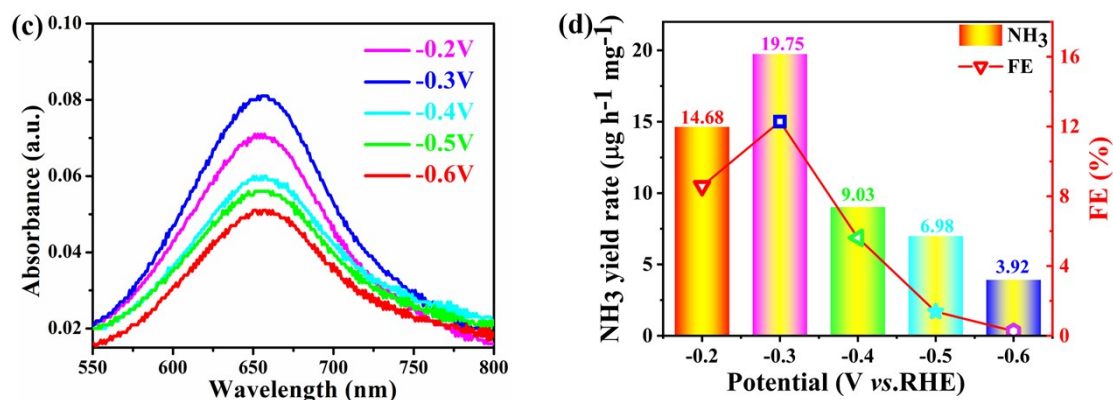

**Figure S13** (a) Polarization curves of Co-pds-H<sub>2</sub>tdc in N<sub>2</sub> and Ar-saturated 0.1M Na<sub>2</sub>SO<sub>4</sub> electrolyte; (b) Time-dependent current densities curves of Co-pds-H<sub>2</sub>tdc at different potentials from -0.2 V to -0.6 V; (c) UV-vis spectra were estimated with the indophenol blue method at five given voltages for Co-pds-H<sub>2</sub>tdc; (d) NH<sub>3</sub> yield and FE of Co-pds-H<sub>2</sub>tdc at different potentials from -0.2 V to -0.6 V.

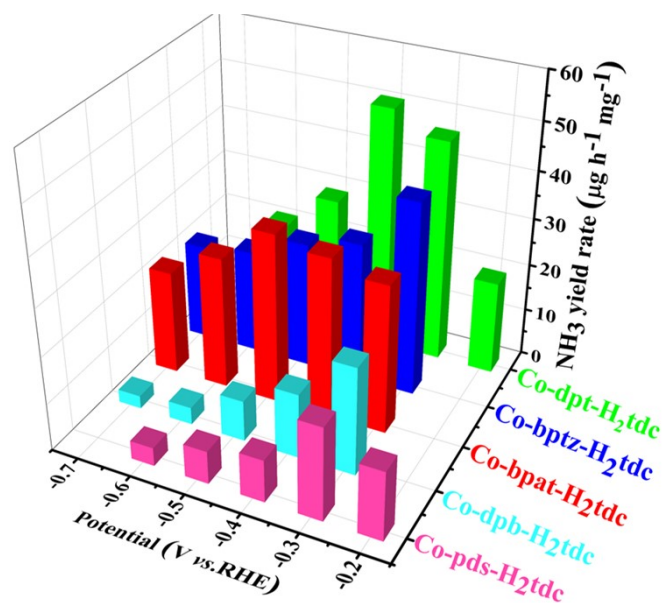

**Figure S14** Comparison of NH<sub>3</sub> yield of Co-dpt-H<sub>2</sub>tdc, Co-bptz-H<sub>2</sub>tdc, Co-bpat-H<sub>2</sub>tdc, Co-dpb-H<sub>2</sub>tdc, Co-pds-H<sub>2</sub>tdc.



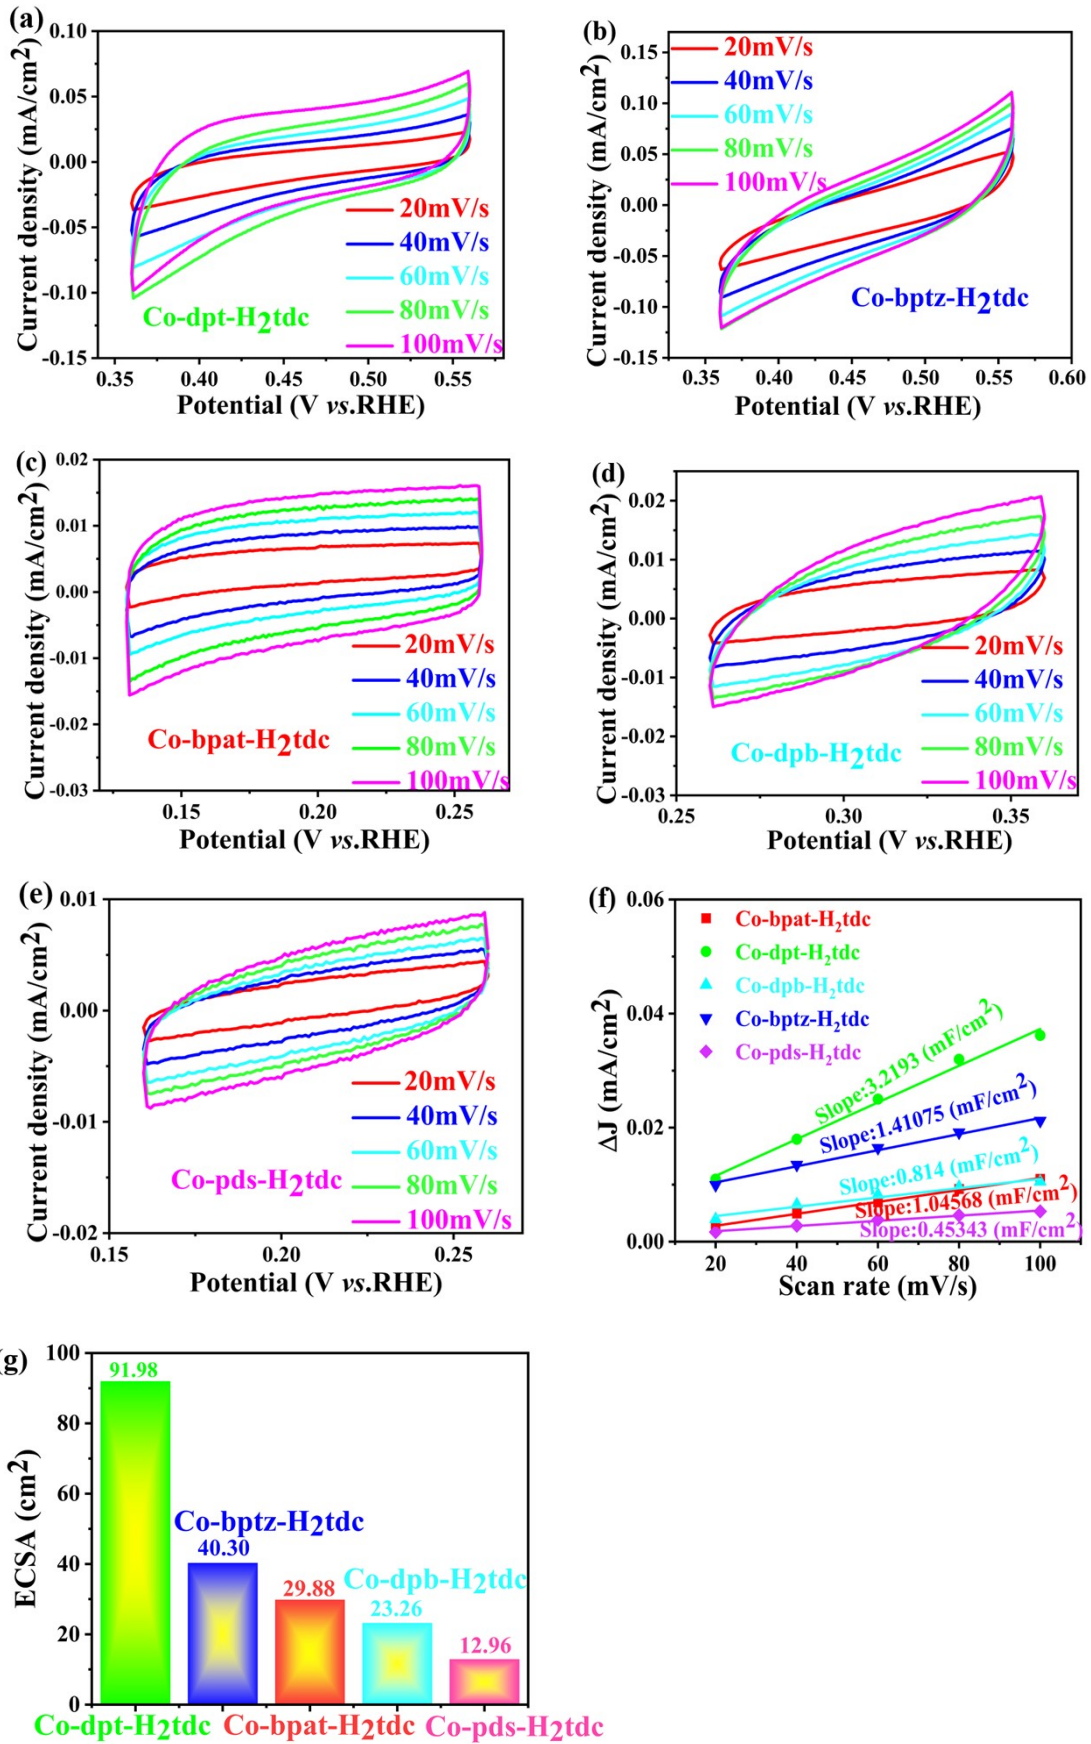

Figure S15 The CV of (a) Co-dpt-H<sub>2</sub>tdc; (b) Co-bptz-H<sub>2</sub>tdc; (c) Co-bpat-H<sub>2</sub>tdc; (d) Co-

dpb-H<sub>2</sub>tdc; (e) Co-pds-H<sub>2</sub>tdc with different sweep speed; (f) C<sub>dl</sub> corresponding to the five catalysts; (g) ECSA corresponding to the five catalysts.

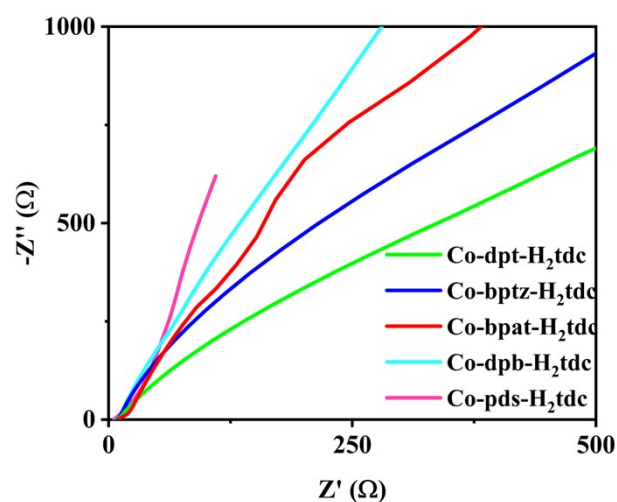

**Figure S16** The EIS corresponding to the five catalysts.

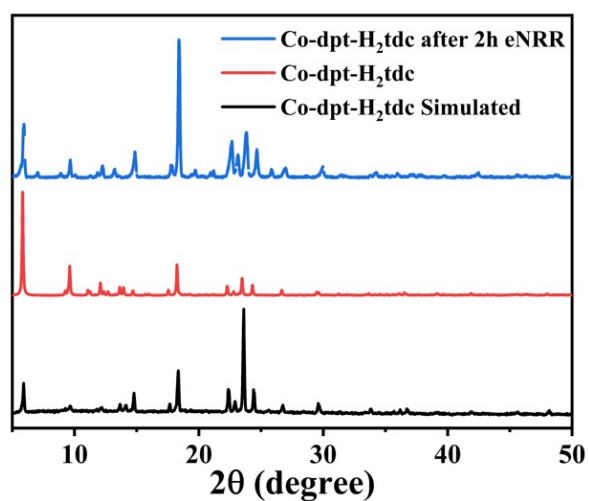

**Figure S17** PXRD of Co-dpt-H<sub>2</sub>tdc before and after eNRR electrocatalysis and standard spectra simulated.

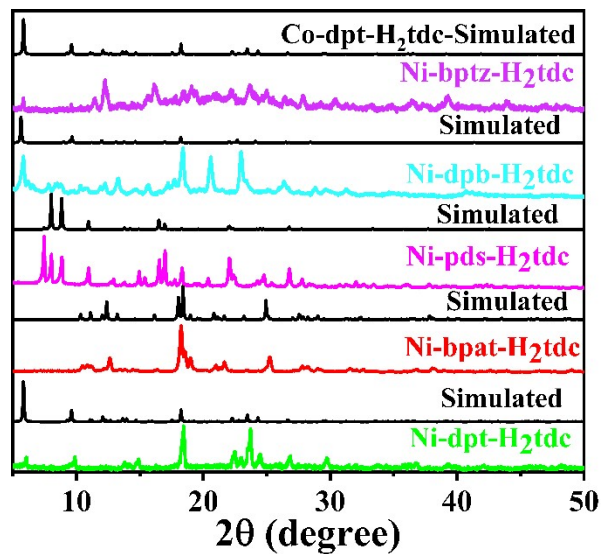

**Figure S18** Comparison of standard spectra simulated by single-crystal diffraction

data with PXRD of five Ni-MOFs.

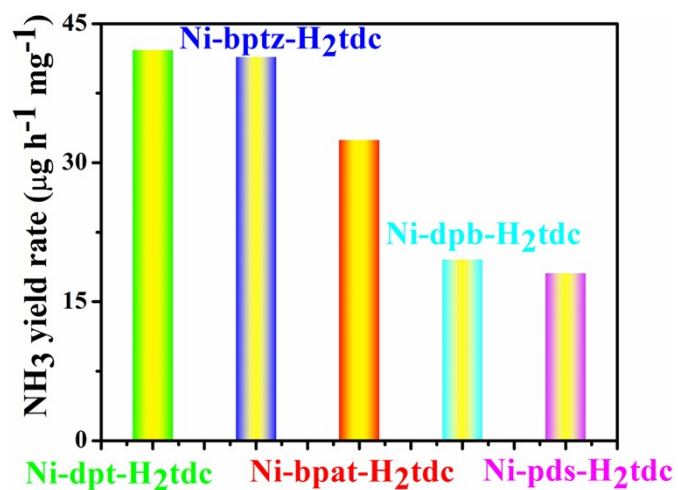

**Figure S19** NH<sub>3</sub> yield rate at optimum voltage for five Ni-MOF catalysts.

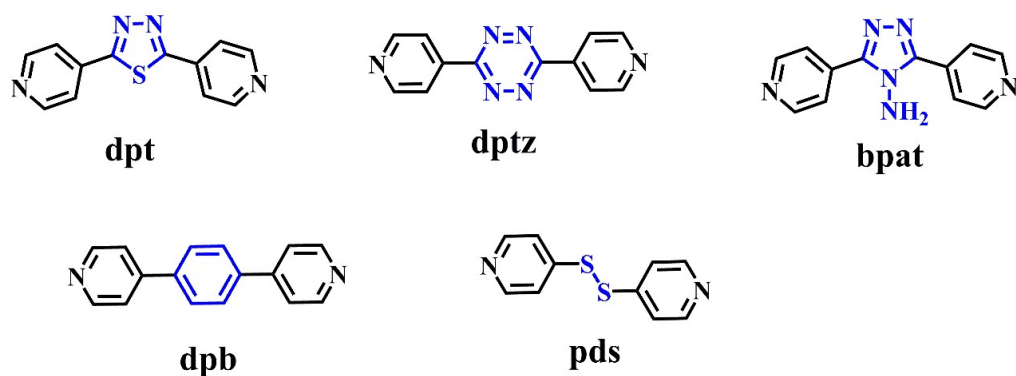

**Figure S20** The structures of ligands.

**Table S2** Crystallographic data and structure refinement details.

| Crystal                                             | Co-dpb-H <sub>2</sub> tdc                                                    | Co-dpt-H <sub>2</sub> tdc                                                                    | Co-bpat-H <sub>2</sub> tdc                                        | Co-pds-H <sub>2</sub> tdc                                                                    |
|-----------------------------------------------------|------------------------------------------------------------------------------|----------------------------------------------------------------------------------------------|-------------------------------------------------------------------|----------------------------------------------------------------------------------------------|
| Formula                                             | C <sub>44</sub> Co <sub>2</sub> N <sub>4</sub> O <sub>8</sub> S <sub>2</sub> | C <sub>36</sub> H <sub>20</sub> Co <sub>2</sub> N <sub>8</sub> O <sub>8</sub> S <sub>4</sub> | C <sub>22</sub> H <sub>23</sub> CoN <sub>7</sub> O <sub>6</sub> S | C <sub>32</sub> H <sub>22</sub> Co <sub>2</sub> N <sub>4</sub> O <sub>9</sub> S <sub>6</sub> |
| Formula Weight                                      | 894.46                                                                       | 938.70                                                                                       | 572.46                                                            | 916.76                                                                                       |
| Crystal System                                      | monoclinic                                                                   | monoclinic                                                                                   | hexagonal                                                         | orthorhombic                                                                                 |
| Space group                                         | P2 <sub>1</sub> /c                                                           | P2 <sub>1</sub> /c                                                                           | P6 <sub>1</sub>                                                   | C222 <sub>1</sub>                                                                            |
| a/Å                                                 | 15.7170(17)                                                                  | 15.156(3)                                                                                    | 9.8884(3)                                                         | 16.8320(14)                                                                                  |
| b/Å                                                 | 18.306(3)                                                                    | 18.378(2)                                                                                    | 9.8884(3)                                                         | 14.5894(16)                                                                                  |
| c/Å                                                 | 16.1574(19)                                                                  | 15.9626(18)                                                                                  | 42.8119(13)                                                       | 23.725(3)                                                                                    |
| α/deg                                               | 90                                                                           | 90                                                                                           | 90                                                                | 90                                                                                           |
| β/deg                                               | 94.027(11)                                                                   | 91.834(12)                                                                                   | 90                                                                | 90                                                                                           |
| γ/deg                                               | 90                                                                           | 90                                                                                           | 120                                                               | 90                                                                                           |
| V/Å <sup>3</sup>                                    | 4637.3(11)                                                                   | 4443.9(11)                                                                                   | 3625.3(3)                                                         | 5826.1(11)                                                                                   |
| Z                                                   | 4                                                                            | 4                                                                                            | 6                                                                 | 4                                                                                            |
| D(calc)<br>[g/cm <sup>3</sup> ]                     | 1.281                                                                        | 1.403                                                                                        | 1.573                                                             | 1.045                                                                                        |
| Mu (MoKa)<br>[ /mm]                                 | 0.856                                                                        | 0.989                                                                                        | 0.851                                                             | 0.821                                                                                        |
| F (000)                                             | 1768                                                                         | 1896                                                                                         | 1770                                                              | 1856                                                                                         |
| Temperature<br>(K)                                  | 293                                                                          | 293                                                                                          | 293                                                               | 293                                                                                          |
| Theta Min-<br>Max                                   | 2.1, 25.0                                                                    | 3.4, 25.0                                                                                    | 2.4, 25.0                                                         | 3.4, 25.0                                                                                    |
| Tot., Uniq.<br>Data                                 | 20061, 8161                                                                  | 7788, 7788                                                                                   | 16548, 4242                                                       | 17266, 5117                                                                                  |
| R(int)                                              | 0.101                                                                        | 0.000                                                                                        | 0.057                                                             | 0.062                                                                                        |
| Observed<br>Data                                    | 2195                                                                         | 4039                                                                                         | 3900                                                              | 4332                                                                                         |
| Nref, Npar                                          | 8161, 541                                                                    | 7788, 523                                                                                    | 4242, 338                                                         | 5117, 241                                                                                    |
| R                                                   | 0.1733                                                                       | 0.1141                                                                                       | 0.0504                                                            | 0.0962                                                                                       |
| wR <sub>2</sub>                                     | 0.4908                                                                       | 0.3041                                                                                       | 0.0951                                                            | 0.2921                                                                                       |
| S                                                   | 1.06                                                                         | 1.02                                                                                         | 1.10                                                              | 1.13                                                                                         |
| Max. and<br>Av.<br>Shift/Error                      | 0.28, 0.03                                                                   | 0.00, 0.00                                                                                   | 0.00, 0.00                                                        | 0.00, 0.00                                                                                   |
| Min. and<br>Max. Resd.<br>Dens. [e/Å <sup>3</sup> ] | -1.31, 3.59                                                                  | -0.83, 3.10                                                                                  | -0.65, 0.56                                                       | -0.74, 1.60                                                                                  |

**Table S3** Selected bond lengths (Å) and angles (deg) for Co-MOFs

| Co-dpb-H <sub>2</sub> tdc |           |             |          |
|---------------------------|-----------|-------------|----------|
| Co1-O1                    | 2.085(13) | O3-Co1-N1   | 89.1(5)  |
| Co1-O3                    | 2.011(10) | O3-Co1-N2a  | 88.1(5)  |
| Co1-O5                    | 2.051(11) | O5-Co1-N1   | 91.5(5)  |
| Co1-N1                    | 2.151(11) | O5-Co1-N2a  | 87.3(5)  |
| Co1-N2a                   | 2.125(14) | N1-Co1-N2a  | 176.1(5) |
| Co2-O4                    | 2.038(13) | O4-Co2-O6   | 117.9(5) |
| Co2-O6                    | 2.020(10) | O4-Co2-N3   | 89.8(5)  |
| Co2-N3                    | 2.182(11) | O4-Co2-N4a  | 90.5(5)  |
| Co2-N4a                   | 2.164(14) | O4-Co2-O7b  | 92.5(5)  |
| Co2-O7b                   | 2.096(13) | O4-Co2-O8b  | 150.5(4) |
| Co2-O8b                   | 2.377(13) | O6-Co2-N3   | 86.2(5)  |
| O1-Co1-O3                 | 150.1(5)  | O6-Co2-N4a  | 91.0(4)  |
| O1-Co1-O5                 | 92.6(4)   | O6-Co2-O7b  | 149.5(5) |
| O7b-Co2-O8b               | 58.0(5)   | O6-Co2-O8b  | 91.6(5)  |
| O1-Co1-N1                 | 93.6(5)   | N3-Co2-N4a  | 177.0(5) |
| O1-Co1-N2a                | 90.2(5)   | O7b-Co2-N3  | 90.9(5)  |
| O3-Co1-O5                 | 117.1(5)  | O7b-Co2-N4a | 92.1(5)  |
| N3-Co2-O8b                | 89.9(5)   | N4a-Co2-O8b | 91.3(5)  |

Symmetry element: a = -1 + x, y, z; b = x, 3/2 - y, -1/2 + z.

| Co-dpt-H <sub>2</sub> tdc |          |             |          |
|---------------------------|----------|-------------|----------|
| Co1-O1                    | 2.032(6) | O5-Co1-N4b  | 90.9(2)  |
| Co1-O5                    | 2.094(6) | O5-Co1-O8c  | 149.3(2) |
| Co1-N1                    | 2.104(8) | N1-Co1-N4b  | 175.9(3) |
| Co1-N4b                   | 2.127(9) | N1-Co1-O6   | 90.2(3)  |
| Co1-O8c                   | 2.024(5) | N4b-Co1-O6  | 89.3(3)  |
| Co1-O6                    | 2.370(6) | O8c-Co1-N1  | 87.4(2)  |
| Co2-O3d                   | 2.402(6) | O8c-Co1-N4b | 88.5(2)  |
| Co2-O2                    | 2.005(6) | O8c-Co1-O6  | 90.7(2)  |
| Co2-N5                    | 2.154(8) | O2-Co2-N5   | 85.9(3)  |
| Co2-N8a                   | 2.088(8) | O2-Co2-N8a  | 89.4(3)  |
| Co2-O7c                   | 2.015(6) | O2-Co2-O7c  | 117.2(2) |
| Co2-O4d                   | 2.092(6) | O2-Co2-O4d  | 148.4(2) |
| O1-Co1-O5                 | 93.6(2)  | O7c-Co2-N5  | 90.9(3)  |
| O1-Co1-N1                 | 91.7(3)  | O4d-Co2-N5  | 90.7(2)  |
| O1-Co1-N4b                | 90.6(3)  | O7c-Co2-N8a | 92.4(3)  |
| O1-Co1-O8c                | 117.1(2) | O4d-Co2-N8a | 92.7(2)  |
| O1-Co1-O6                 | 152.1(2) | O2-Co2-O3d  | 90.2(2)  |

|             |          |             |          |
|-------------|----------|-------------|----------|
| O5-Co1-O6   | 58.6(2)  | N5-Co2-N8a  | 175.1(3) |
| O5-Co1-N1   | 92.3(2)  | O4d-Co2-O7c | 94.2(2)  |
| O7c-Co2-O3d | 152.5(2) | O4d-Co2-O3d | 58.3(2)  |
| N5-Co2-O3d  | 88.9(3)  | N8-Co1-O3d  | 89.9(2)  |

Symmetry element:  $a = -1 + x, y, z$ ;  $b = 1 + x, y, z$ ;  $c = x, 1/2 - y, -1/2 + z$ ;  $d = x, 3/2 - y, -1/2 + z$ .

| Co-bpat-H <sub>2</sub> tdc |            |             |            |
|----------------------------|------------|-------------|------------|
| Co1-O1                     | 2.217(4)   | O1W-Co1-O2  | 151.80(16) |
| Co1-O1W                    | 2.087(4)   | O1W-Co1-N5  | 89.99(16)  |
| Co1-O2                     | 2.170(4)   | O1W-Co1-N6  | 94.23(16)  |
| Co1-N5                     | 2.171(4)   | O1W-Co1-O3a | 98.10(15)  |
| Co1-N6                     | 2.152(4)   | O2-Co1-N5   | 88.30(14)  |
| Co1-O3a                    | 2.023(4)   | O2-Co1-N6   | 88.77(14)  |
| O1-Co1-O1W                 | 91.94(15)  | O2-Co1-O3a  | 109.91(16) |
| O1-Co1-O2                  | 60.16(16)  | N5-Co1-N6   | 175.5(2)   |
| O1-Co1-N5                  | 94.43(18)  | O3a-Co1-N5  | 86.85(17)  |
| O1-Co1-N6                  | 87.14(18)  | O3a-Co1-N6  | 90.87(17)  |
| O1-Co1-O3a                 | 169.89(16) |             |            |

Symmetry element:  $a = x, -1 + y, z$ .

| Co-pds-H <sub>2</sub> tdc |          |             |          |
|---------------------------|----------|-------------|----------|
| Co1-O1                    | 2.084(6) | O5-Co1-N1   | 90.7(3)  |
| Co1-O5                    | 2.144(5) | O3c-Co1-O5  | 95.8(3)  |
| Co1-N1                    | 2.167(9) | O5-Co1-N2b  | 174.7(2) |
| Co1-O3a                   | 2.059(7) | O4d-Co1-O5  | 87.8(2)  |
| Co1-N2b                   | 2.151(9) | O3c-Co1-N1  | 89.3(3)  |
| Co1-O4c                   | 2.086(7) | N1-Co1-N2b  | 94.0(3)  |
| O1-Co1-O5                 | 90.4(2)  | O4d-Co1-N1  | 177.9(3) |
| O1-Co1-N1                 | 90.1(3)  | O3c-Co1-N2b | 86.8(3)  |
| O1-Co1-O3a                | 173.8(3) | O3c-Co1-O4c | 92.3(3)  |
| O1-Co1-N2b                | 87.1(3)  | O4d-Co1-N2b | 87.5(3)  |
| O1-Co1-O4c                | 88.5(3)  |             |          |

Symmetry element:  $a = -1/2 + x, 1/2 + y, z$ ;  $b = 1/2 + x, 1/2 + y, z$ ;  $c = 5/2 - x, 1/2 + y, 3/2 - z$ .

**Table S4** Summary of the eNRR performances for reported electrocatalysts.

| Catalysts                                   | Electrolyte                           | NH <sub>3</sub> yield<br>( $\mu\text{g}\cdot\text{h}^{-1}\cdot\text{mg}_{\text{cat}}^{-1}$ ) | FE<br>(%) | Refs.     |
|---------------------------------------------|---------------------------------------|----------------------------------------------------------------------------------------------|-----------|-----------|
| MoS <sub>2</sub> @ZIF-71                    | 0.1 M Na <sub>2</sub> SO <sub>4</sub> | 56.69                                                                                        | 30.91     | 28        |
| $\beta$ Bi <sub>2</sub> O <sub>3</sub> -0.6 | 0.1 M Na <sub>2</sub> SO <sub>4</sub> | 51.36                                                                                        | 38.67     | 29        |
| Co-dpt-H <sub>2</sub> tdc                   | 0.1 M Na <sub>2</sub> SO <sub>4</sub> | 51.30                                                                                        | 29.2      | This work |
| HT Au@MOF                                   | 0.1 M Na <sub>2</sub> SO <sub>4</sub> | 49.5                                                                                         | 60.9      | 30        |
| MoFe-PC                                     | 0.1M HCl                              | 34.23                                                                                        | 16.83     | 31        |
| Co-TCPP                                     | 0.1 M HCl                             | 28.3                                                                                         | 11.58     | 32        |
| PdCu@UiO-S@PDMS                             | 0.1 M HCl                             | 20.24                                                                                        | 13.16     | 37        |
